# Supplementary material
Source: PubMed Central journal article supplement (PMC3616535)
Supplement: mt201316x1.pdf [file mt201316x1.pdf]

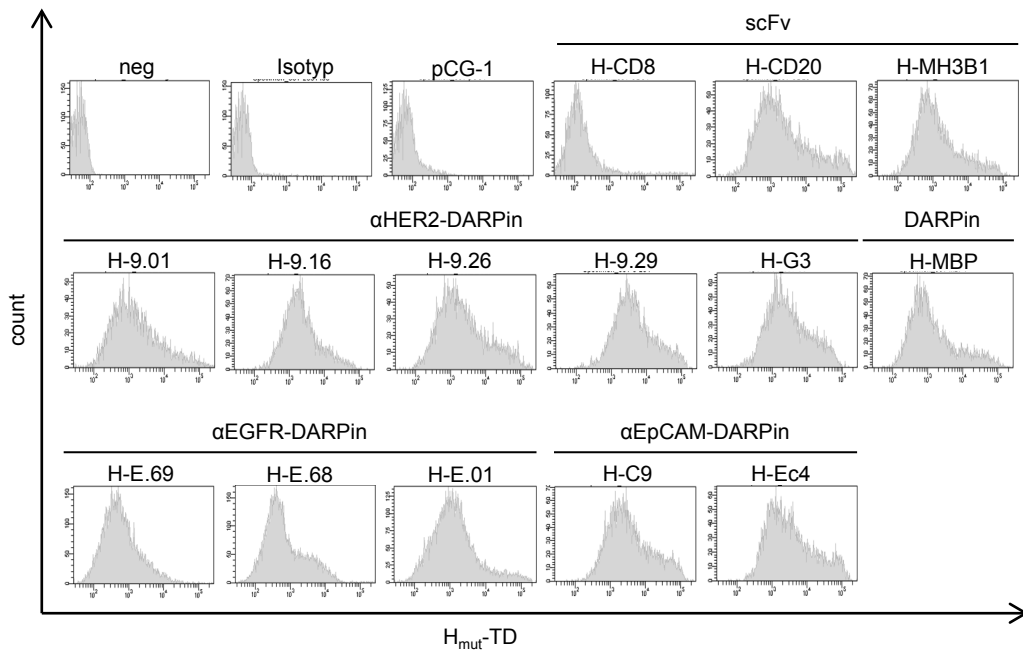

**Supplementary Figure S1**

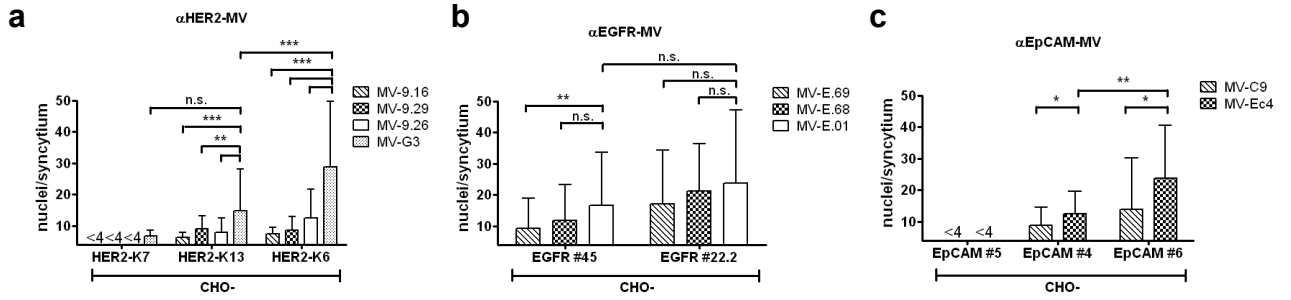

Supplementary Figure S2.

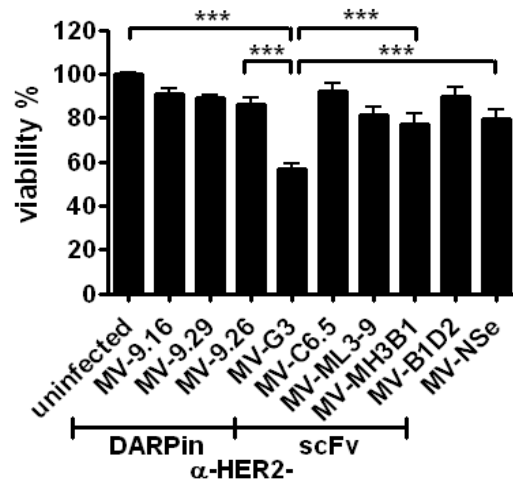

Supplementary Figure S3.

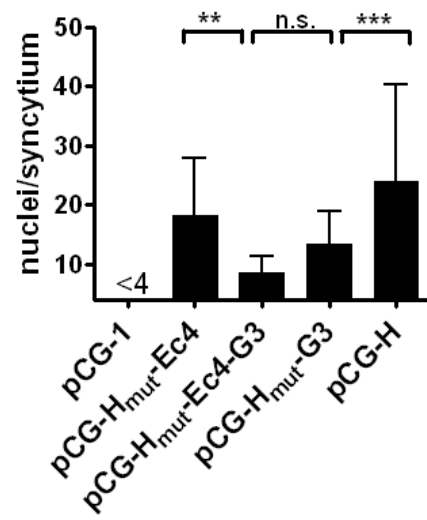

Supplementary Figure S4.

Supplementary Table S1. Surface densities of transgenic CHO-cell lines.

| CHO-cell clone | Receptor density <sup>a</sup> |
|----------------|-------------------------------|
| <i>HER2</i>    |                               |
| #7             | $7.7 \times 10^2$             |
| #13            | $3.7 \times 10^4$             |
| #6             | $2.1 \times 10^5$             |
| <i>EpCAM</i>   |                               |
| #5             | $9.9 \times 10^2$             |
| #4             | $4.2 \times 10^3$             |
| #6             | $8.5 \times 10^3$             |
| <i>EGFR</i>    |                               |
| #45            | $5.2 \times 10^3$             |
| #22.2          | $3.8 \times 10^4$             |

<sup>a</sup>Number of respective HER2/*neu*, EpCAM or EGFR molecules per cell.

Supplementary Table S2. Median Survival of animals

| Group     | Median Survival [days] | 95%-CI <sup>a</sup> | N <sup>b</sup> | Deaths | Surviving <sup>c</sup> |
|-----------|------------------------|---------------------|----------------|--------|------------------------|
| MV-NSe    | 103.0                  | 62 – 106            | 10             | 8      | 2                      |
| MV-G3     | 89.0                   | 81 – 103            | 11             | 10     | 1                      |
| MV-9.26   | 81.0                   | 54 – 89             | 9              | 8      | 1                      |
| MV-MH3B1  | 71.5                   | 62 – 74             | 10             | 10     | 0                      |
| UV-inact. | 50.5                   | 46 – 63             | 10             | 10     | 0                      |
| OptiMEM   | 49.0                   | 46 – 49             | 12             | 12     | 0                      |

<sup>a</sup>95% Confidence Interval for Median Survival

<sup>b</sup>Total number of animals per group

<sup>c</sup>Surviving animals were censored for statistical analysis
